# Supplementary material for: Incidence and Risk Factors for Venous Thromboembolism in Female Patients Undergoing Breast Surgery
Source: MDPI journal article supplement (doi:10.3390/cancers14040988), 2022-02-16
Supplement: s1 [file s1]

# Supplementary Materials: Incidence and Risk Factors for Venous Thromboembolism in Female Patients Undergoing Breast Surgery

Ambrogio P. Londero, Serena Bertozzi, Carla Cedolini, Silvia Neri, Michela Bulfoni, Maria Orsaria, Laura Mariuzzi, Alessandro Uzzau, Andrea Risaliti and Giovanni Barillari

**Table S1.** Breast cancer staging.

| Variables         | Values             |
|-------------------|--------------------|
| Tumor Size        |                    |
| Tis               | 11.55% (460/3983)  |
| T1                | 62.72% (2498/3983) |
| T2                | 21.04% (838/3983)  |
| T3                | 2.21% (88/3983)    |
| T4                | 2.49% (99/3983)    |
| Nodal status      |                    |
| N0                | 69.65% (2774/3983) |
| N1                | 18.75% (747/3983)  |
| N2                | 6.18% (246/3983)   |
| N3                | 5.42% (216/3983)   |
| TNM stage         |                    |
| Stage 0           | 11.55% (460/3983)  |
| Stage I           | 46.55% (1854/3983) |
| Stage II          | 27.12% (1080/3983) |
| Stage III         | 12.58% (501/3983)  |
| Stage IV          | 2.21% (88/3983)    |
| Tumor grading (*) |                    |
| G 1               | 12.8% (451/3524)   |
| G 2               | 60.93% (2147/3524) |
| G 3               | 26.28% (926/3524)  |

(\*) Only invasive breast cancer. Acronyms: TNM= tumor, nodes, and metastases.
